# Supplementary material for: Association between Cesarean section and neurodevelopmental disorders in a Japanese birth cohort: the Japan Environment and Children’s Study
Source: Springer Nature journal article supplement (doi:10.1186/s12887-023-04128-5), 2023-06-19
Supplement: MOESM1 [file 25511342]

Supplementary Table 1. Difference between included and excluded.

| Variable                                                                | Included<br>(n = 65,701) |        | Excluded<br>(n = 27,240) |        |
|-------------------------------------------------------------------------|--------------------------|--------|--------------------------|--------|
|                                                                         | n                        | (%)    | n                        | (%)    |
| Deliberly mode                                                          |                          |        |                          |        |
| Vaginal delivery                                                        | 53,527                   | (81.5) | 21,406                   | (80.2) |
| Cesarean section                                                        | 12,174                   | (18.5) | 5,302                    | (19.9) |
| Age during pregnancy, y                                                 |                          |        |                          |        |
| Mean ± SD                                                               | 31.4                     | ±4.9   | 30.0                     | ±5.4   |
| Pre-pregnancy body mass index, kg/m <sup>2</sup>                        |                          |        |                          |        |
| Mean ± SD                                                               | 21.2                     | ±3.2   | 21.4                     | ±3.5   |
| Parity                                                                  |                          |        |                          |        |
| 0                                                                       | 28,606                   | (43.5) | 9,925                    | (39.9) |
| 1                                                                       | 24,597                   | (37.4) | 9,310                    | (37.4) |
| ≥2                                                                      | 12,498                   | (19.0) | 5,630                    | (22.6) |
| History of depression, anxiety disorder, dysautonomia, or schizophrenia |                          |        |                          |        |
| No                                                                      | 56,544                   | (86.1) | 22,018                   | (84.7) |
| Yes                                                                     | 9,157                    | (13.9) | 3,993                    | (15.4) |
| History of any physical disease                                         |                          |        |                          |        |
| No                                                                      | 10,801                   | (16.4) | 5,242                    | (20.2) |
| Yes                                                                     | 54,900                   | (83.6) | 20,769                   | (79.9) |
| Pregnancy complication                                                  |                          |        |                          |        |
| No                                                                      | 55,744                   | (84.8) | 21,412                   | (84.9) |
| Yes                                                                     | 9,957                    | (15.2) | 3,800                    | (15.1) |
| Marital status                                                          |                          |        |                          |        |
| Married                                                                 | 63,410                   | (96.5) | 23,719                   | (92.7) |
| Single                                                                  | 1,857                    | (2.8)  | 1,509                    | (5.9)  |
| Divorced or widowed                                                     | 434                      | (0.7)  | 370                      | (1.5)  |
| Employed during early pregnancy                                         |                          |        |                          |        |
| No                                                                      | 29,601                   | (45.1) | 11,951                   | (48.2) |
| Yes                                                                     | 36,100                   | (55.0) | 12,823                   | (51.8) |
| Highest education level, y                                              |                          |        |                          |        |
| ≤12                                                                     | 21,620                   | (32.9) | 11,208                   | (44.7) |
| 12 to <16                                                               | 28,514                   | (43.4) | 9,686                    | (38.6) |
| ≥16                                                                     | 15,567                   | (23.7) | 4,180                    | (16.7) |
| Annual household income, million JPY                                    |                          |        |                          |        |
| <4                                                                      | 25,303                   | (38.5) | 8,666                    | (45.6) |
| 4 to <6                                                                 | 22,062                   | (33.6) | 5,900                    | (31.0) |
| ≥6                                                                      | 18,336                   | (27.9) | 4,441                    | (23.4) |
| Alcohol intake                                                          |                          |        |                          |        |
| Never                                                                   | 22,119                   | (33.7) | 8,143                    | (32.8) |
| Former                                                                  | 41,785                   | (63.6) | 15,994                   | (64.4) |
| Current                                                                 | 1,797                    | (2.7)  | 718                      | (2.9)  |
| Smoking history                                                         |                          |        |                          |        |

|                                    |         |             |         |             |
|------------------------------------|---------|-------------|---------|-------------|
| Never                              | 39,590  | (60.3)      | 12,763  | (51.4)      |
| Former                             | 23,782  | (36.2)      | 10,269  | (41.3)      |
| Current                            | 2,329   | (3.5)       | 1,806   | (7.3)       |
| Negative attitude toward pregnancy |         |             |         |             |
| No                                 | 61,119  | (93.0)      | 23,329  | (91.2)      |
| Yes                                | 4,582   | (7.0)       | 2,244   | (8.8)       |
| Child sex                          |         |             |         |             |
| Male                               | 33,652  | (51.2)      | 14,026  | (51.5)      |
| Female                             | 32,049  | (48.8)      | 13,196  | (48.5)      |
| Any major congenital anomaly       |         |             |         |             |
| No                                 | 64,218  | (97.7)      | 26,482  | (97.2)      |
| Yes                                | 1,483   | (2.3)       | 758     | (2.8)       |
| Gestational age, week              |         |             |         |             |
| Mean $\pm$ SD                      | 39.3    | $\pm$ 1.5   | 39.2    | $\pm$ 1.8   |
| Birth weight, g                    |         |             |         |             |
| Mean $\pm$ SD                      | 3,028.2 | $\pm$ 408.7 | 3,005.1 | $\pm$ 445.8 |

---
